# Supplementary material
Source: Springer Nature journal article supplement (https://www.springermedizin.de/resource/supplementary/12887_2005_91_MOESM5_ESM.pdf/9477246)
Supplement: MOESM5 [file 9477246]

## Differences of Standardized Mean Differences

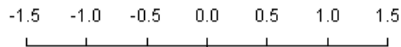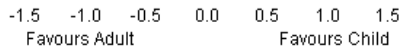

| Author                                 | Child<br>SMD (95%CI) | Adult<br>SMD (95%CI) |
|----------------------------------------|----------------------|----------------------|
| <b>Asthma (Age 18 yrs cutoff)</b>      |                      |                      |
| Adams A                                | 0.05 [-0.57,0.67]    | 0.31 [-0.43,1.05]    |
| Adams C**                              | 0.43 [0.13,0.73]     | 0.67 [0.35,0.99]     |
| Walters                                | 0.37 [-0.08,0.82]    | -0.02 [-0.12,0.08]   |
| Hondras**                              | -0.39 [-0.70,-0.07]  | -0.08 [-0.78,0.63]   |
| Spooner**                              | 0.94 [0.68,1.19]     | 1.42 [0.58,2.27]     |
| Kelly                                  | 0.02 [-0.31,0.36]    | -0.17 [-0.97,0.63]   |
| <b>Asthma (Age 14 yrs cutoff)</b>      |                      |                      |
| Adams B                                | 0.13 [-0.73,0.99]    | -0.12 [-0.37,0.14]   |
| Spooner**                              | 0.94 [0.68,1.19]     | 1.28 [0.89,1.67]     |
| <b>Lacerations (Age 18 yrs cutoff)</b> |                      |                      |
| Osmond*                                | -0.0003 [-0.67,0.67] | 0.17 [-0.29,0.62]    |
